# Supplementary material for: Transcriptional dysregulation in neurodegenerative diseases: who tipped the balance of Yin Yang 1 in the brain?
Source: PubMed Central journal article supplement — Neural Regen Res. 2019 Jul;14(7):1148–51. doi: 10.4103/1673-5374.251193 (PMC6425841; doi:10.4103/1673-5374.251193), 2019-07
Supplement: NRR-14-1148_Suppl1.pdf [file NRR-14-1148_Suppl1.pdf]

**OPEN PEER REVIEW REPORT 1**

**Name of journal:** Neural Regeneration Research

**Manuscript NO:** NRR-D-18-00709

**Title:** Transcriptional dysregulation in neurodegenerative diseases: Who tipped the balance of Yin Yang 1 in the brain?

**Reviewer's Name:** Hans-Gert Bernstein

**Reviewer's country:** Germany

**Date sent for review:** 2018-11-20

**Date reviewed:** 2018-11-20

**Review time:** 1 days

**COMMENTS TO AUTHORS**

This is an interesting and well-written overview about roles of Yin Yang 1 in cerebral tissues.

Suggestions:

Although I understand that the authors are more interested in neurons I recommend to indicate that YY1 has also important functions in astroglia, oligodendroglia and microglia. Especially its influence on Astrocytic Excitatory Amino Acid Transporter 1 might be of considerable interest with regard to neurological disorders.

Minor point:

With regard to the list of references :

1. Your own paper Chen et al. Please add the following information:

pii: e45409. doi: 10.15252/embr.201745409

2. The Davis paper: please add volume and pages: Davis AA etc. 34:545-568.
